# Supplementary material
Source: Elsevier journal article supplement (https://www.sciencedirect.com/science/article/pii/S021391111830013X)
Supplement: mmc1 [file S021391111830013X:mmc1.docx]

**Appendix A**

**Table I**

List of Social solidarity clinics and available internet resources (N=92), Greece, 2014-2015.

| **Name** | **Location** | **Internet address(es)** |
| --- | --- | --- |
| Municipal polyclinic Kifisias "Dimitrios Varelas" [Dimotiko Polyiatreio Kifisias "Dimitrios Varelas"] | Kifisia, Attica | http://bit.ly/2A3GNFa |
| Dribetio Centre of Health Promotion [Dribeteio Kentro Proagogis Ygeias] | Kifisia, Attica | <http://www.kifissia.gr/main/content/Kekoipo/iatreio.html> |
| Social Clinic - Pharmacy of Athens [Koinoniko Iatreio-Farmakeio Athinas] | Athens, Attica | <http://kifagr.blogspot.gr/> |
| Social Clinic - Pharmacy "Athanasios Tiliakos" [Koinoniko Iatreio - Farmakeio "Athanasios Tiliakos"] | Kilkis, Kilkis | [http://bit.ly/2A1IHbH](http://bit.ly/2A1IHbH%20) |
| Social Solidarity Clinic-Pharmacy "Network of Social Solidarity of Heraklion" [Koinoniko Iatreio - Farmakeio Allileggiis "Dyktiou Koinonikis Allileggiis Irakleiou"] | Heraklion, Heraklion | <http://koinoniaher.gr/> |
| Self-managed Social Clinic/Pharmacy of New Philadelphia - New Chalkidona - New Ionia and surrounding areas [Autodiaxeirizomeno Koinoniko Iatreio/Farmakeio Neas Filadelfias - Neas Chalkidonas - Neas Ionias kai giro perioxon] | New Philadelphia, Attica | <http://koinonikoiatreionfnx.espivblogs.net/> |
| Social Soidarity Clinic of I don't Pay Movement [Koinoniko Iatreio Kinimatos Den Plirono] | Athens, Attica | [http://kinimadenplirono.gr/ , http://epitropesdiodiastop.blogspot.gr/2014/07/to-ko.html](http://kinimadenplirono.gr/) |
| Social Clinic "Hygeia" [Koinoniko Iatreio "Ygeia"] | Thessaloniki, Thessalonikis | http://bit.ly/2hLmNic |
| Solidarity Clinic [Iatreio Allileggiis] | Volos, Magnisias | http://bit.ly/2hN9Swz |
| Social Clinic - Pharmacy of Aliveri [Koinoniko Iatreio - Farmakeio Aliveriou] | Aliveri, Evoia | <http://omada--allileggyis--aliveriou.blogspot.gr/> |
| Social Solidarity Clinic [Koinoniko Iatreio Allileggiis] | Korinthos, Korinthias | <http://www.kiakorinthou.blogspot.gr/> |
| Metropolitan Community Clinic at Helliniko [Mitropolitiko Koinoniko Iatreio] | Helliniko, Attica | <http://www.mkiellinikou.org/> |
| Social Solidarity Clinic - Pharmacy [Koinoniko Iatreio - Farmakeio Allileggiis] | Chania, Chanion | http://bit.ly/2mXb7Pc |
| Solidarity Clinic [Allileggio Iatreio] | Pireaus, Attica | <http://a-iatreio.blogspot.gr/> |
| Municipal Clinic Egaleo [Dimotiko Iatreio Aigaleo] | Aigaleo, Attica | http://bit.ly/2jhjik3, http://www.localit.gr/archives/42538 |
| Social Clinic of Solidarity [Koinoniko Iatreio Allileggiis] | Thessaloniki, Thessalonikis | <http://www.kiathess.gr/> |
| Social Municipal Clinic of Chios Municipality [Koinoniko Dimotiko Iatreio Dimou Chiou] | Chios, Dodekanisou | <http://www.chiospress.gr/koinonia/19028,> http://bit.ly/2jg4xxS |
| Social Pharmacy of Nafplio [Koinoniko Farmakeio Nafpliou] | Nafplio, Argolidas | [http://bit.ly/2zscH19, http://bit.ly/2zZy88M,](http://bit.ly/2zscH19,%20http://bit.ly/2zZy88M,%20http://www.report24.gr/litourgia-kinwnikou-farmakiou-sto-nafplio.htm)  http://bit.ly/2iIHtbT |
| Social Solidarity Clinic - Pharmacy [Koinoniko Iatreio - Farmakeio Allileggiis] | Drama, Dramas | [http://www.kifadramas.gr/, https://www.facebook.com/groups/kifadramas/](http://www.kifadramas.gr/) |
| A' & B' Municipal Clinic & A' Physiotherapy Clinic & Pharmacy [A' & B' Dimotiko Iatreio & A' Physikotherapeutirio & Farmakeio] | Agios Dimitrios, Attica | [http://bit.ly/2ApvfiH, http://www.dad.gr/index.php/dimotika-iatreia](http://bit.ly/2ApvfiH,%20http://www.dad.gr/index.php/dimotika-iatreia) |
| Social Clinic "Georgios N Papaioannou" [Koinoniko Iatreio "Georgios N Papaioannou] | Agrinio, Aitoloakarnania | <https://www.facebook.com/iatreiok> |
| Social Cardiology Clinic of Athens [Koinoniko Kardiologiko Iatreio Athinas] | Athens, Attica |  |
| Social Solidarity Clinic Kolonou-Ak. Platona-Sepolia [Iatreio Koinonikis Allileggiis Kolonou - Ak. Platona - Sepolia] | Athens, Attica | <http://sineleusikolonou.blogspot.gr/> |
| Synyparksi | Athens, Attica | <http://www.syn-yparxi.gr/> |
| Voluntary Social Clinic-Pharmacy of Alexandroupoli Municipality [Ethelontiko Koinoniko Iatreio - Farmakeio Dimou Alexandroupolis] | Alexandroupoli, Alexandroupolis | <http://www.alexpolis.gr/default.asp?static=407> |
| Social Clinic of Arkalochori [Koinoniko Iatreio Arkalochoriou] | Arkalochori, Heraklion | [https://www.facebook.com/koiniatrark, http://www.koinonikoiatreioarkalohoriou.gr/](https://www.facebook.com/koiniatrark) |
| Social Parmacy/Clinic Vyrona [Koinoniko Farmakeio/ Iatreio Vyrona] | Vyronas, Attica | [http://k-iatreio.blogspot.gr/,](http://k-iatreio.blogspot.gr/)  http://bit.ly/2jNI4wj |
| Social Clinic Pharmacy of Paionia Municipality [Koinoniko Iatreio Farmakeio - KIF Dimou Paionias] | Goumenissa, Kilkis | [http://bit.ly/2B4NEhc, http://bit.ly/2AnKngi,](http://bit.ly/2B4NEhc,%20http://bit.ly/2AnKngi,%20)  http://bit.ly/2A09RzM |
| Self-managed health structure of Exarchia [Autoorganomeni Domi Ygeias Exarchion] | Athens, Attica | <http://adye.espivblogs.net/> |
| Social Solidarity Clinic [Koinoniko Iatreio Allileggiis] | Igoumenitsa, Thesprotias | <http://www.kiathesp.blogspot.gr/> |
| Social Solidarity Clinic [Koinoniko Iatreio Allileggiis] | Thermi, Thessalonikis | <http://www.kialli.gr/> |
| Social Clinic OLTH at the Harbour [Koinoniko Iatreio OLTH sto Limani] | Thessaloniki, Thessalonikis | [http://koinwniko-iatreio.blogspot.gr/,](http://koinwniko-iatreio.blogspot.gr/)  http://bit.ly/2hWJ3d1 |
| Social Network of Doctors and Pharmacists [Koinoniko Diktyo Iatron & Farmakopoion] | Ilion, Attica | <https://www.facebook.com/jakpotaki> |
| Municipal Social Clinic-Pharmacy of Ioannina [Dimotiko Koinoniko Iatreio-Farmakeio Ioanninon] | Ioannina, Ioanninon | http://bit.ly/2BgFTpc |
| Social Clinic [Koinoniko Iatreio] | Kalamata, Messinias | <http://dikalkal.wordpress.com/> |
| Social Clinic/Pharmacy "Alekos Ftikas" [Koinoniko Iatreio/Farmakeio "Alekos Ftikas" | Katerini, Pieria | <http://www.otoposmou.gr/> |
| Solidarity Network of Doctors of Kifisia [Diktyo Allileggiis Iatron Kifisias] | Kifisia, Attica |  |
| Social Solidarity Clinic [Iatreio Koinonikis Allileggiis] | Kozani, Kozani | <https://www.facebook.com/KoinwnikoIatreioKozanis> |
| Social Clinic-Pharmacy "Solidarity Place" [Koinoniko Iatreio - Farmakeio "Topos Allileggiis"] | Larisa, Larisas | <http://koinwnikoiatreiolarisas.blogspot.gr/> |
| Municipal Social Polyclinic-Pharmacy of Marousi Municipality [Dimotiko Koinoniko Polyiatreio - Farmakeio Dimou Amarousiou] | Marousi, Attica | [http://www.maroussi.gr/default.aspx?lang=el-GR&page=61,](http://www.maroussi.gr/default.aspx?lang=el-GR&page=61)  http://bit.ly/2zdmdRA |
| Social Solidarity Clinic-Pharmacy of Lesbos [Iarteio - Farmakeio Koinonikis Allileggiis Lesbou] | Mitilini, Lesbou | <http://xoriooloimazi.blogspot.gr/p/blog-page_13.html> |
| Medicosocial centre of Lesvos Municipality [Iatrokoinoniko Kentro Dimou Lesbou] | Mitilini, Lesbou | [http://bit.ly/2ztcvij, http://bit.ly/2mVbucY, http://bit.ly/2iIyZl3,](http://bit.ly/2ztcvij,%20%20http://bit.ly/2mVbucY,%20http://bit.ly/2iIyZl3,%20)  http://bit.ly/2hUP4GU |
| Social Pharmacy of Thermaikos Municipality [Koinoniko Farmakeio Dimou Thermaikou] | Neoi Epivates, Thessalonikis | <http://koinonikiprostasia.blogspot.gr/> |
| Social Clinic Pharmacy "Oloi Mazi" [Koinoniko Iatreio Farmakeio "Oloi Mazi" | Nafpaktos, Etoloakarnanias | <http://oloimazinafpaktias.blogspot.gr/> |
| Class Solidarity Clinic-Pharmacy of Nea Smyrni [Iatreio - Farmakeio Taksikis Allileggiis Neas Smyrnis] | Nea Smyrni, Attica | [http://ergatikilesxi.wordpress.com/,](http://ergatikilesxi.wordpress.com/)  http://bit.ly/2AoYK4f |
| Social Solidarity Clinic-Pharmacy of Nea Smyrni [Koinoniko Iatreio - Farmakeio Allileggiis Neas Smyrnis] | Nea Smyrni, Attica | <http://kifa-nsmirnis.gr/wp/> |
| Social Clinic of Xanthi [Koinoniko Iatreio Xanthis] | Xanthi, Xanthis | <http://www.im-xanthis.gr/koinoniko-iatreio/> |
| Solidarity Clinic of Patisia-Acharnes [Iatreio Allileggiis Patision-Acharnon] | Athens, Attica | [http://iatreioapa.blogspot.gr/,](http://iatreioapa.blogspot.gr/)  http://bit.ly/2iHoZsd |
| Solidarity Clinic-Pharmacy [Farmakeio - Iatreio Allileggiis] | Athens, Attica | <http://koinonikofarmakeio.blogspot.gr/> |
| Social Clinic-Pharmacy [Koinoniko Iatreio - Farmakeio] | Patra, Achaia | http://bit.ly/2B41wrQ |
| Social Solidarity Clinic [Iatreio Koinonikis Allileggiis] | Peristeri, Attica | <http://iatreioallperisteriou.wordpress.com/> |
| People's assembly of Petralona-Thisio-Koukaki - Social space for health [Laiki sineleusi Petralonon-Thiseiou-Koukakiou - Koinonikos choros gia tin ygeia] | Petralona, Attica | <http://laikisineleusipetralona.espivblogs.net/> |
| Social Clinic-Pharmacy [Koinoniko Iatreio - Farmakeio] | Pyrgos, Ilias | http://bit.ly/2iHfGZj |
| Voluntary Social Solidarity Clinic-Pharmacy [Elethontiko Iatreio - Farmakeio Koinonikis Allileggiis] | Rethymno, Rethimnis | <http://www.ethiatreio.com/> |
| Voluntary Social Clinic [Ethelontiko Koinoniko Iatreio] | Rhodos, Dodekanisou | <http://www.ekifrodos.gr/> |
| Social Solidarity Clinic [Koinoniko Iatreio Allileggiis] | Salamina, Attica | http://bit.ly/2hVfEzY |
| Social Pharmacy of Samos [Koinoniko Farmakeio Samou] | Samos, Samou | [http://koinonikofarmakeio-samos.gr/,](http://koinonikofarmakeio-samos.gr/)  http://bit.ly/2zZEipq |
| Social Pharmacy of Santorini [Koinoniko Farmakeio Santorinis] | Santorini, Kyklades |  |
| Social Solidarity Network of Artemida-Spata "Manolis Geranios" [Diktyo Koinonikis Alleleggiis Artenidos-Sparwn "Manolis Geranios"] | Spata, Attica | [http://artemisdka.blogspot.gr/, http://artemisdka.blogspot.gr/2012_10_01_archive.html](http://artemisdka.blogspot.gr/) |
| Social Clinic [Koinoniko Iatreio] | Athens, Attica | [http://bit.ly/2zXTQKt,](http://bit.ly/2zXTQKt,%20)  http://bit.ly/2hMaKBC |
| Social Pharmacy of Labour Centre of Chania [Koinoniko Farmakeio Ergatikou Kentrou Chanion] | Chania, Chanion | http://bit.ly/2AnLWLc |
| Social Solidarity Clinic [Koinoniko Iatreio Allileggiis] | Chios, Dodekanisou | <http://www.lathra.gr/koinoniko-iatreio> |
| Clinic of Social Mission [Iatreio Koinonikis Apostolis] | Athens, Attica | [http://www.mkoapostoli.com/?page_id=1165,](http://www.mkoapostoli.com/?page_id=1165)  http://bit.ly/2A14roc |
| Social Clinic Pharmacy, Annex of the Clinic of Social Mission of Municipality of Vari-Voula-Vouliagmeni [Koinoniko Iatreio Farmakeio, Parartima tou Iatreiou Koinonikis Apostolis tou Dimou Varis-Voulas-Vouliagmenis] | Vari-Voula-Vouliagmeni, Attica | [http://bit.ly/2BaQgL3,](http://bit.ly/2BaQgL3,%20)  http://bit.ly/2hVhTmv |
| Social Clinic of Edessa | Edessa, Pellas | http://bit.ly/2A0Gz3N[, http://www.enet.gr/?i=news.el.article&id=388232](http://www.odigostoupoliti.eu/kinoniko-iatrio-edessas/#sthash.28ixwVY3.dpbs) |
| Social Clinic of Kordelio-Evosmos Municipality | Thessaloniki, Thessalonikis | [http://bit.ly/2mQhrrm , http://bit.ly/2A3xRQd,](http://bit.ly/2mQhrrm%20,%20http://www.aftodioikisi.gr/dimoi/d-kordeliou-evosmou-se-leitourgia-to-koinoniko-farmakeio,%20http://www.kordelio-evosmos.gr/index.php?option=com_content&task=view&id=2465&Itemid=766)  <http://bit.ly/2zXAFkm> |
| Social Solidarity Clinic | Ilioupoli, Attica | <http://www.ilioupoli.gr/koinonikoIatreio.aspx> |
| Social Clinic Pharmacy, Annex of the Clinic of Social Mission of Municipality of Municipality of Ilion [Koinoniko Iatreio Farmakeio, Parartima tou Iatreiou Koinonikis Apostolis tou Dimou Iliou] | Ilion, Attica | http://bit.ly/2hMbfeY |
| Social Clinic - Pharmacy of North Evoia [Koinoniko Iatreio - Farmakeio Voreiou Evoias] | Istiaia, Evoia | <http://koinonikoifevias.blogspot.gr/> |
| Social Clinic-Pharmacy of Kavala | Kavala, Kavalas | http://www.kavala.gov.gr/, http://bit.ly/2hLFy5s |
| Social Clinic [Koinoniko Iatreio] | Kerkyra, Kerkyras | <http://www.zougla.gr/greece/article/kinoniko-iatrio-stin-kerkira> |
| Social Clinic - Pharmacy [Koinoniko Iatreio - Farmakeio] | Korinthos, Korinthias | <http://www.kkpdimkorinthos.gr/koinwnikaprogrammata/koinoniko-iatreio-pharmakeio/> |
| Social Clinic - Pharmacy of Y.K.P.A.A.P. of Lagadas Municipality [Koinoniko Iatreio - Farmakeio tis Y.K.P.A.A.P tou Dimou Lagkada] | Lagadas, Thessalonikis | http://bit.ly/2zYgu5q |
| Social Clinic - Pharmacy [Koinoniko Iatreio - Farmakeio] | Nea Ionia, Attica | <http://kifaneaionia.blogspot.gr/> |
| Social Clinic Pharmacy, Annex of the Clinic of Social Mission of Municipality of Municipality of Neo Irakleio [Koinoniko Iatreio Farmakeio, Parartima tou Iatreiou Koinonikis Apostolis tou Dimou Neou Irakleiou] | Neo Iraklio, Attica | [http://www.iraklio.gr/default.asp?static=445. http://bit.ly/2jLvzB8, http://www.enikos.gr/society/93194,](http://www.iraklio.gr/default.asp?static=445.%20http://bit.ly/2jLvzB8,%20http://www.enikos.gr/society/93194,%20)  <http://bit.ly/2jLvzB8> |
| Social Clinic - Pharmacy [Koinoniko Iatreio - Farmakeio] | Saronikos, Attica | [http://bit.ly/2iIbs3t, http://www.localit.gr/archives/31202, http://bit.ly/2BdQTnh,](http://bit.ly/2iIbs3t,%20http://www.localit.gr/archives/31202,%20http://www.forkeratea.com/2013/04/blog-post_740.html,%20) |
| Social Clinic - Pharmacy of Sparta [Koinoniko Iatreio - Farmakeio Spartis] | Sparti, Lakonias | <http://www.enallaktikos.gr/kg15el_koinwniko-iatreio-farmakeio-spartis_a815.html> |
| Social Clinic - Pharmacy [Koinoniko Iatreio - Farmakeio] | Trikala, Trikalon | [http://bit.ly/2mU0NXW, http://bit.ly/2mRZE3b, http://bit.ly/2zsGg2y, http://bit.ly/2A3LCyu](http://bit.ly/2mU0NXW,%20http://bit.ly/2mRZE3b,%20http://bit.ly/2zsGg2y,%20http://bit.ly/2A3LCyu%20) |
| Social Clinic - Pharmacy of Chalkida [Koinoniko Iatreio - Farmakeio Chalkidos] | Chalkida, Evoia | <http://koinonikoifevias.blogspot.gr/> |
| Social Clinic - Pharmacy of Aigio [Koinoniko Farmakeio Aigiou] | Aigio, Achaia | [http://bit.ly/2iFNGFu, http://bit.ly/2jOR7Ne,](http://bit.ly/2iFNGFu,%20http://bit.ly/2jOR7Ne,%20)  http://bit.ly/2BeKKan |
| Social Clinic - Pharmacy of Municipality of Pavlos Melas [Koinoniko Iatreio - Farmakeio Dimou Pavlou Mela] | Thessaloniki, Thessalonikis | <http://bit.ly/2B3ljaT>, [http://www.koinwnikesdomes.gr/index.php/pharmacy,](http://www.pavlosmelas.gr/index.php?option=com_content&task=view&id=1869&Itemid=1366)  http://bit.ly/2AnA0tg |
| Social Clinic - Pharmacy of Municipality of Karditsa [Koinoniko Iatreio - Farmakeio tou Dimou Karditsas] | Karditsa, Karditsas | [http://www.dimoskarditsas.gov.gr/?page_id=4283, http://bit.ly/2hXAfn0, http://www.dimoskarditsas.gov.gr/?page_id=4283](http://www.aftodioikisi.gr/dimoi/egkainia-gia-to-koinoniko-iatreio-farmakeio-tou-dimou-karditsas) |
| Social Clinic of Mesologgi [Koinoniko Iatreio Mesologgiou] | Mesologgi, Etoloakarnanias | [http://bit.ly/2iHCfwI, http://palmosetoloakarnanias.blogspot.gr/2013/03/blog-post_6798.html](http://www.aftodioikisi.gr/dimoi/mesolongi-xekinise-i-leitourgia-tou-koinonikou-iatreiou) |
| Healthcare professionals' Network "Strofi" [Diktyo Ygeionomikon "Strofi" | Nea Smyrni, Attica | <http://strofi-ns.gr/> |
| Municipal- Social Clinic - Pharmacy of Pallini [Dimotiko-Koinoniko Iatreio-Farmakeio Pallinis] | Pallini, Attica | [http://pallini.gr/pages/koinoniko-farmakeio, http://gerakas.org.gr/site/?p=19578,](http://pallini.gr/pages/koinoniko-farmakeio)  http://bit.ly/2iHBhAQ |
| Social Municipal Clinics of Patra [Koinonika Dimotika Iatreia Patras] | Patra, Achaia | [http://bit.ly/2B41wrQ,](http://bit.ly/2B41wrQ,%20http://www.e-patras.gr/web/guest/citizens/health-and-social-care/residential-care)  http://bit.ly/2hJEY85 |
| Social Counceling Clinic [Symbouleutiko Koinoniko Iatreio] | Pireaus, Attica | <http://synodoiporia.blogspot.gr/p/blog-page.html> |
| Social Clinic of Petroupoli [Koinoniko Iatreio Petroupolis] | Petroupoli, Attica | [http://bit.ly/2jS7ZD6,](http://bit.ly/2jS7ZD6,%20http://www.petroupoli.gr/uploadfiles/2014-DTSigentrosisSilogon.pdf)  http://bit.ly/2zYmBqD |
| Clinic of Social Awareness [Iatreio Koinonikis Antilipsis] | Serres, Serron | [http://bit.ly/2zeSqbb, http://bit.ly/2iIGF6R, http://www.amen.gr/article8750](http://bit.ly/2zeSqbb,%20http://bit.ly/2iIGF6R,%20http://www.amen.gr/article8750) |
| Social Clinic - Pharmacy-Dental Clinic [Koinoniko Iatreio-Farmakeio-Odontiatreio] | Tripoli, Arkadias | http://bit.ly/2mU5OQg |
| Social Clinic of Municipality of Eordaia [Koinoniko Iatreio Dimou Eordaias] | Ptolemaida, Kozanis | [http://bit.ly/2mTCmdo, http://vrizidou.blogspot.gr/2012_02_01_archive.html](http://bit.ly/2mTCmdo,%20http://vrizidou.blogspot.gr/2012_02_01_archive.html) |
| Social Clinic of Holy Metropolis of Peristeri [Koinoniko Iatreio tis Ieras Mitropolis Peristeriou] | Peristeri, Attica | [https://www.facebook.com/MaziKoinonikoIatreioPeristeriou,](https://www.facebook.com/MaziKoinonikoIatreioPeristeriou)  http://bit.ly/2hOfer3 |
